# Supplementary material for: Nuclear mRNPs are compact particles packaged with a network of proteins promoting RNA–RNA interactions
Source: PubMed Central journal article supplement (PMC10393194; doi:10.1101/gad.350630.123), 2023-06-01
Supplement: supp_gad.350630.123_Supplemental_Fig_S4.pdf [file supp_gad.350630.123_Supplemental_Fig_S4.pdf]

# Supplemental Figure S4

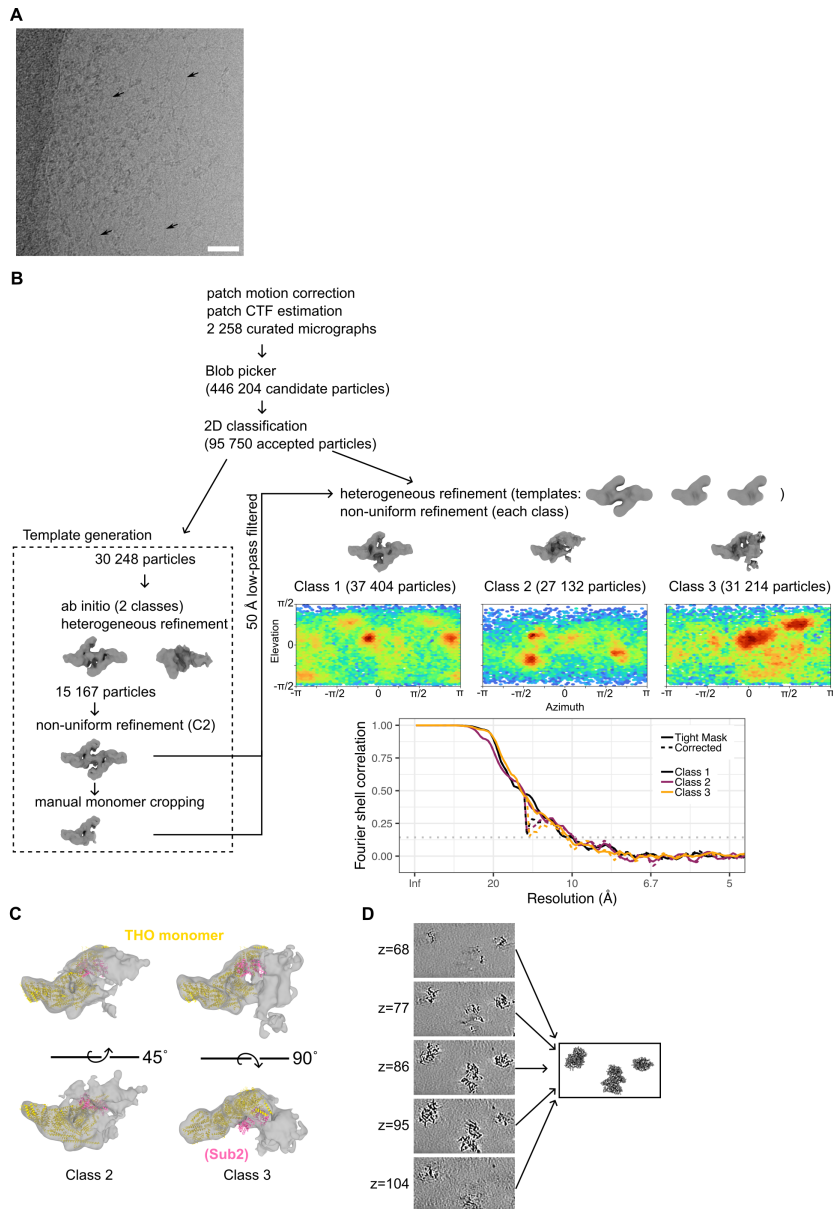

## Electron microscopy analyses

**A)** Cryo-electron micrograph crop-out of particles eluted in native conditions in free ice, using a grid pre-coated with Epidermal growth factor (EGF) in an attempt to prevent adsorption on the carbon foil. The grid was pre-incubated 1 min with 4  $\mu$ l EGF at 4  $\mu$ M before blotting and sample application. Acquired at 2.5  $\mu$ m defocus. Arrows point to fibers that presumably correspond to RNA from disassembled particles. Scale bar is 500  $\text{\AA}$ .

**B)** Processing scheme for single particle analysis of Benzonase-treated mRNPs with CryoSPARC. To allow for separation of particles showing clear dimers from particles where one THO monomer appears missing or in a variable position, a refinement with an imposed C2 symmetry was performed, and a manually cropped monomer was generated. 3D classification, including all accepted particles and using 50  $\text{\AA}$  low-passed filtered symmetric dimer and monomer as templates, yielded one class of a complete dimer (class 1). Heatmaps of particle orientations in each final reconstruction are shown, together with Fourier shell correlation plots of refined half-maps with mask auto-tightening before and after correction. "Gold standard" correlation level of 0.143 is indicated as a dotted gray line.

**C)** One monomer from a previously published structure of recombinant THO-Sub2 (pdb:7apx) (Schuller et al. 2020) was fitted into 3D reconstructions of the two least populated classes from B (gray volumes). THO is yellow, Sub2 is pink.

**D)** Five evenly spaced z-slices from the reconstructed and denoised tomogram (left) with the corresponding extracted volumes (right). Raw frames were corrected for beam-induced motion with MotionCor2 (Zheng et al. 2017) and further processed with IMOD (Mastronarde 1997).

For these analyses, micrographs were acquired with SerialEM (Schorb et al. 2019) using a beam-tilt based multi-shot acquisition scheme for faster imaging with a defocus target range spanning -1.5 to -3  $\mu$ m. Each acquisition was fractionated into 40 frames with a total exposure of 59  $e/\text{\AA}^2$  over 16 sec. Collected data were processed in CryoSPARC 4 (Punjani et al. 2017). Raw movie frames (2306) were aligned by patch motion correction, and per-micrograph contrast transfer function (CTF) was estimated with the patch CTF implementation. After removal of defocus outliers, 2258 micrographs were selected for

particle picking with the blob-picker using a range of 200 to 320 Å particle diameter. Adjusting template correlation and local power thresholds for the picks resulted in 446204 candidate particles extracted with a 324 pixel box size. Multiple rounds of reference-free 2D classification and removal of junk classes reduced this number to 95750 accepted particles.

The final three classes were further refined by non-uniform refinement (Punjani et al. 2020) and mask auto-tightening, giving three reconstructions reaching an approximate global resolution of 11 Å according to the Fourier shell correlation (FSC) cut-off criterion of 0.143 for the independent half maps (Rosenthal and Henderson 2003).

Mastrorade DN. 1997. Dual-axis tomography: an approach with alignment methods that preserve resolution. *Journal of structural biology* **120**: 343–352.

Punjani A, Rubinstein JL, Fleet DJ, Brubaker MA. 2017. cryoSPARC: algorithms for rapid unsupervised cryo-EM structure determination. *Nat Methods* **14**: 290–296.

Punjani A, Zhang H, Fleet DJ. 2020. Non-uniform refinement: adaptive regularization improves single-particle cryo-EM reconstruction. *Nat Methods* **17**: 1214–1221.

Rosenthal PB, Henderson R. 2003. Optimal determination of particle orientation, absolute hand, and contrast loss in single-particle electron cryomicroscopy. *Journal of molecular biology* **333**: 721–745.

Schorb M, Haberbosch I, Hagen WJH, Schwab Y, Mastrorade DN. 2019. Software tools for automated transmission electron microscopy. *Nat Methods* **16**: 471–477.

Zheng SQ, Palovcak E, Armache J-P, Verba KA, Cheng Y, Agard DA. 2017. MotionCor2: anisotropic correction of beam-induced motion for improved cryo-electron microscopy. *Nat Methods* **14**: 331–332.
